# Supplementary material for: Randomised controlled trial of the clinical and cost-effectiveness of a peer-delivered self-management intervention to prevent relapse in crisis resolution team users: study protocol
Source: PubMed Central journal article supplement — BMJ Open. 2017 Oct 27;7(10):e015665. doi: 10.1136/bmjopen-2016-015665 (PMC5665309; doi:10.1136/bmjopen-2016-015665), 2017-10-27
Supplement: bmjopen-2016-015665supp002.pdf [file bmjopen-2016-015665supp002.pdf]

**CORE Phase 3: consent form for participation in randomised controlled trial of a peer-provided, self-management intervention for people leaving Crisis Resolution Teams**

Version 4: 04 November 2015

**Study Title: CORE: Crisis Team Optimisation and Relapse Prevention – Phase 3**

Principal Investigator: Professor Sonia Johnson, UCL,  
Research worker:

1. I have read and understood the study information sheet dated 04 November 2015

2. I have had the opportunity to ask questions about the study

3. I understand that my participation is voluntary and that I can withdraw at any time, without giving any reason, without the services provided to me being affected.

4. I understand that the Crisis Resolution Team (CRT) which supported me will be informed that I am taking part in the study.

5. I agree to my GP being informed of my participation in the study

6. I consent to a researcher contacting a family member or a member of staff, if I have named them below, if this is necessary to make contact with me for the study follow-up interview.

7. I consent to the information collected about me for this study being stored securely at University College London

8. I understand that I will be offered a £20 gift in cash for my participation in the research interview, once I have taken part in it.

9. I understand that relevant sections of my medical notes and data collected during the study may be looked at by individuals from regulatory authorities and/or the NHS Foundation Trust where it is relevant to my taking part in the research. I give permission for these individuals to have access to my records.
10. I consent to the research team having access to information about my diagnosis and my use of mental health services from my electronic patient records. If information about my use of services is not available from my electronic patient records in the NHS Trust whose services I am currently using, I consent to study researchers collecting this information where possible from other NHS services.
11. I consent to a researcher contacting me up to 2 years after my follow-up interview to ask me about taking part in a further research interview for this study, or a separate follow-on study relating to this one.
12. I agree to take part in the study

**My preferred contact details:**

Name:

Address:

Phone number(s):

E-mail address:

Preferred method of contact:

- Phone  
 E-mail  
 Letter

**Contact details of family members or carers I am happy for a researcher to contact if necessary to contact me for a follow-up interview:**

*(If possible, please provide details of any family members or carers whom researchers could contact if unable to contact you directly for a follow-up interview.)*

|                             | Family contact #1 | Family contact #2 |
|-----------------------------|-------------------|-------------------|
| Name                        |                   |                   |
| Relationship to participant |                   |                   |
| Address                     |                   |                   |
| Phone number(s)             |                   |                   |
| email                       |                   |                   |

**Contact details of mental health staff working with me I am happy for a researcher to contact if necessary to contact me for a follow-up interview:**

*(If possible, please provide details of any mental health staff whom researchers could contact if unable to contact you directly for a follow-up interview.)*

Name:

Job title:

Service:

Contact details (if known)

I would like a copy of a report with the study findings when the study is over:

Yes

No

Please sign this consent form below to confirm your consent to take part in the study

\_\_\_\_\_  
Name of participant

\_\_\_\_\_  
Date

\_\_\_\_\_  
Signature

\_\_\_\_\_  
Name of researcher

\_\_\_\_\_  
Date

\_\_\_\_\_  
Signature
